# Supplementary material
Source: PubMed Central journal article supplement (PMC3887942)
Supplement: molcell-36-5-446-9-supplementary.pdf [file molcell-36-5-446-9-supplementary.pdf]

## Supplemental Figure 1

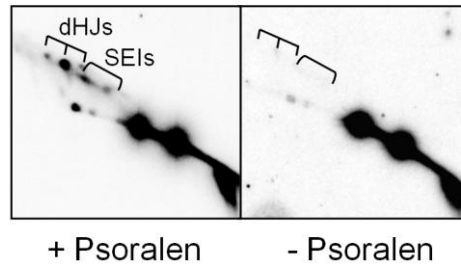

Supplemental Figure 1. Detection of joint molecules from meiotic cell cross-linked with psoralen under UV light.

## Supplemental Figure 2

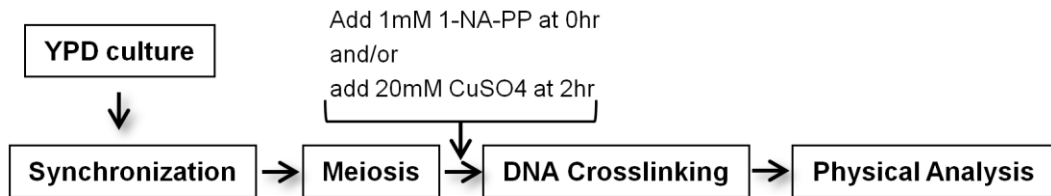

Supplemental Figure 2. Experimental procedures for yeast meiosis by adding 1-NA-PP1 to inhibit Mek1 kinase activity and CuSO<sub>4</sub> to produce Shu1 protein.

## Supplemental Figure 3

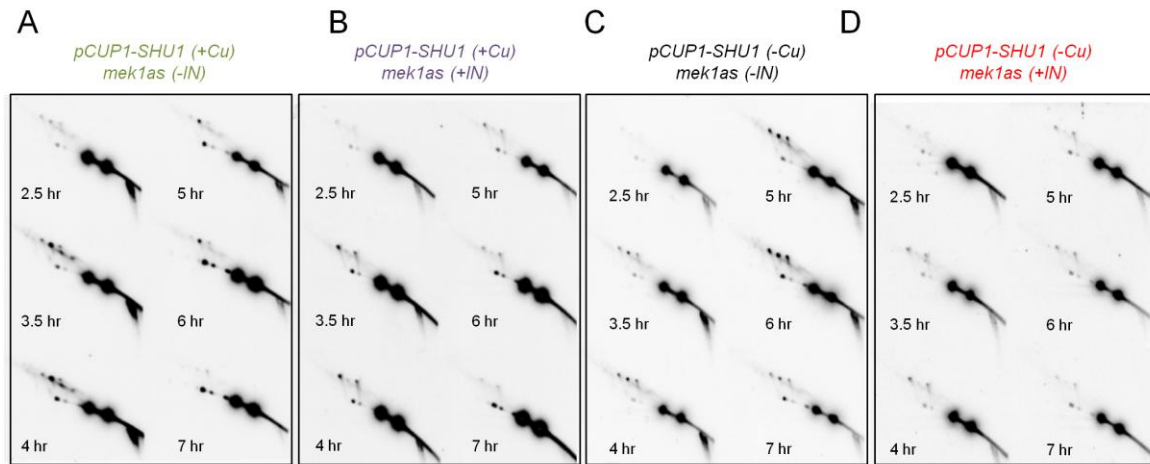

Supplemental Figure 3. Images of two-dimensional gel Southern analysis illustrate the DNA species at different time points. DNA species were separated on two-dimensional gels, which displayed the branched joint molecules. *Xho*I-digested genomic DNA is detected by Southern blot hybridization using a random-primed [<sup>32</sup>P]-dCTP DNA "probe A." Quantitative analysis of the joint molecules is shown in Figure 2F and 2G.

## Supplemental Figure 4

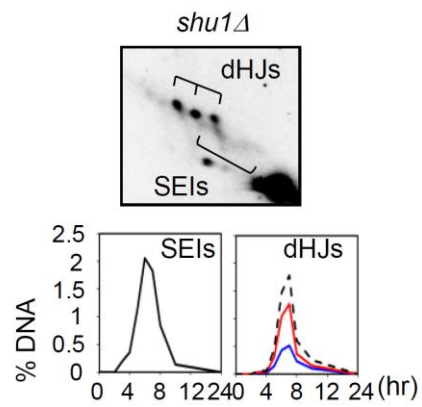

Supplemental Figure 4. Analysis of joint molecules from two-dimensional gel Southern analysis showing the DNA species in *shu1Δ* mutant.
